# Supplementary material for: CTNNBL1 Is a Novel Nuclear Localization Sequence-binding Protein That Recognizes RNA-splicing Factors CDC5L and Prp31
Source: PubMed Central journal article supplement — J Biol Chem. 2011 Mar 8;286(19):17091–102. doi: 10.1074/jbc.M110.208769 (PMC3089553; doi:10.1074/jbc.m110.208769), 2011-03-08
Supplement: supp_M110.208769_jbc.M110.208769-1.pdf [file supp_M110.208769_jbc.M110.208769-1.pdf]

**Table S1****Oligonucleotides used for preparing expression constructs and sequencing.**

| <b>Name</b>                                                                        | <b>Sequence</b>                                                     |
|------------------------------------------------------------------------------------|---------------------------------------------------------------------|
| Cloning NLSs into pEGFPN1 (Clontech) using the HindIII and PstI restriction sites. |                                                                     |
| Cdc5INLS1<br>HPF                                                                   | AGCTTGCCACCATGAAGAAGGCCAAGAGGAAAGCAAGAGAGAAACTGCA                   |
| Cdc5INLS1<br>HPR                                                                   | GTTTCTCTCTTGCTTTCCTCTTGGCCTTCTTCATGGTGGCA                           |
| Cdc5INLS2<br>HPF                                                                   | AGCTTGCCACCATGAAAAGAAGAGAACTTCGACTGCA                               |
| Cdc5INLS2<br>HPR                                                                   | GTCGAAGTTCTCTTCTTTTCATGGTGGCA                                       |
| Cdc5INLS3<br>HPF                                                                   | AGCTTGCCACCATGAAGAAAAGAAAAGGAAGAGACTGCA                             |
| Cdc5INLS3<br>HPR                                                                   | GTCTCTTCCTTTTTCTTTTCTTCATGGTGGCA                                    |
| Cdc5INLS4<br>HPF                                                                   | AGCTTGCCACCATGAGAAAAAAGACAAACAGCATTGAAAAGGAAAAAACTGCA               |
| Cdc5INLS4<br>HPR                                                                   | GTTTTTTCCTTTTCAAATGCTGTTTGTCTTTTTTCTCATGGTGGCA                      |
| SV40NLSH<br>PF                                                                     | AGCTTGCCACCATGCCTAAAAAGAAGCGTAAAGTCCTGCA                            |
| SV40NLSH<br>PR                                                                     | GGACTTTACGCTTCTTTTTAGGCATGGTGGCA                                    |
| NucNLSHPF                                                                          | AGCTTGCCACCATGAAGCGTCCGGCAGCCACTAAGAAGGCAGGTCAAGCGAAAAAGAAAAAGCTGCA |
| NucNLSHP<br>R                                                                      | GCTTTTTCTTTTCGCTTGACCTGCCTTCTTAGTGGCTGCCGGACGCTTCATGGTGCA           |

| <b>Name</b>                                                                                                                                                                       | <b>Sequence</b>                                                       |
|-----------------------------------------------------------------------------------------------------------------------------------------------------------------------------------|-----------------------------------------------------------------------|
| Cloning CDC5L and truncated mutants with N-terminal HA tags in pEGFPC3 (Clontech), with removal of the eGFP cDNA from the vector. The NheI and SacII restriction sites were used. |                                                                       |
| NForNHeI                                                                                                                                                                          | TTAGCTAGCGCCACCATGTACCCATACGACGTCCAGACTACGCCATGCCTCGAAT<br>TATGATCAAG |
| CRevSacII                                                                                                                                                                         | TAACCGCGGAAGTACTTCAGAATTTTG                                           |
| hdelFor                                                                                                                                                                           | TTGGCTAATACTCAGGGAGAATCTGATTTACCATCAGCTA                              |
| idelFor                                                                                                                                                                           | GAAAAACTCTTGCACTTGCAGATTTTCAGATGCAGAACTC                              |
| jdelFor                                                                                                                                                                           | CTCACCAATGTGGACACCGAGCTGGAAGAACGTGAAATA                               |
| kdelFor                                                                                                                                                                           | ACTATTCTAAGACCCTTATTGGTGCAGGAGATGGAAGTG                               |
| ldelFor                                                                                                                                                                           | GACAGAATTGAATCACTTAATGACTTATGGGACCA                                   |
| arevSacII                                                                                                                                                                         | TTCCGCGGTCACTCGGCATTTTCTGGTAGAAC                                      |
| brevSacII                                                                                                                                                                         | TTCCGCGGTCAAGATTCTTTTTTCTTTTCAA                                       |
| cRevSacII                                                                                                                                                                         | TTCCGCGGTCAAGCTTTATCCAGAAGAAATTCAT                                    |
| hdelRev                                                                                                                                                                           | TGATGGTAAATCAGATTCTCCCTGAGTATTAGCCAAGCG                               |
| idelRev                                                                                                                                                                           | TTCTGCATCTGAAATCTGGTGAAGAGTTTTTCCT                                    |
| jdelRev                                                                                                                                                                           | TTCACGTTCTCCAGCTCGGTGTCCACATTGGTGAGGGCCAT                             |

Cloning AID and C-terminally altered mutants in pEGFPN1 using the HindIII and PstI

restriction sites.

HindAIDF AGAAGAAAGCTTGCCACCATGGACAGCCTCTTGATGAAC  
PstAIDR AGAAAGCTGCAGAAGTCCCAAAGTACGAAATGCG  
PstAIDF19 AGAAAGCTGCAGAAGTCCCAAAGTACG  
3R  
PstAID188 AGAAGACTGCAGGTCATCAACCTCATAACAGGGG  
xR

Cloning AID/ A3G NTD into pOPTG (kind gift of Dr. O. Perisic, Cambridge) using the NdeI and BamHI restriction sites.

AIDNdeF CAAACATATGATGGACAGCCTCTTGATGAACCGG  
AIDBamH CTTTGGATCCTCAAAGTCCCAAAGTACGAAATGC  
R  
A3GNdeF CAAACATATGATGAAGCCTCACTTCAGAAAC  
A3GBamH CTTTGGATCCTACGAGTGTCTGAGAATCTCCCC  
R

| Name                                                                                | Sequence                                                      |
|-------------------------------------------------------------------------------------|---------------------------------------------------------------|
| Cloning NLSs in pGEX4T1 (GE Healthcare) using the BamHI and XhoI restriction sites. |                                                               |
| cdc5LNLS1BX                                                                         | GATCCATGAAGAAGGCCAAGAGGAAAGCAAGAGAGAAAC                       |
| F                                                                                   |                                                               |
| cdc5LNLS1BX                                                                         | TCGAGTTTCTCTCTTGCTTTCCTCTTGGCCTTCTTCATG                       |
| R                                                                                   |                                                               |
| cdc5LNLS2BX                                                                         | GATCCATGAAAAGAAGAGAACTTCGAC                                   |
| F                                                                                   |                                                               |
| cdc5LNLS2BX                                                                         | TCGAGTCGAAGTTCTCTTCTTTTCATG                                   |
| R                                                                                   |                                                               |
| cdc5LNLS3BX                                                                         | GATCCATGAAGAAAAGAAAAGGAAGAGAc                                 |
| F                                                                                   |                                                               |
| cdc5LNLS3BX                                                                         | TCGAGTCTTCTCCTTTTTCTTTTCTTCATG                                |
| R                                                                                   |                                                               |
| cdc5LNLS4BX                                                                         | GATCCATGAGAAAAAAGACAAACAGCATTGAAAAGGAAAAAAC                   |
| F                                                                                   |                                                               |
| cdc5LNLS1BX                                                                         | TCGAGTTTTTCTTTTTCAAATGCTGTTTGTCTTTTTTTCTCATG                  |
| R                                                                                   |                                                               |
| SV40NLSBXF                                                                          | GATCCATGCCTAAAAAGAAGCGTAAAGTCc                                |
| SV40NLSBXR                                                                          | TCGAGGACTTTACGCTTCTTTTTAGGCATG                                |
| NucNLSBXF                                                                           | GATCCATGAAGCGTCCGGCAGCCACTAAGAAGGCAGGTCAAGCGAAAAAGAA<br>AAAGC |
| NucNLSBXR                                                                           | TCGAGCTTTTTCTTTTTCGCTTGACCTGCCTTCTTAGTGGCTGCCGGACGCTTCA<br>TG |
| PRP19NLSBX                                                                          | GATCCATGCGCAAGAAGAGAGGGAAGC                                   |
| F                                                                                   |                                                               |
| PRP19NLSBX                                                                          | TCGAGCTCCCTCTCTTCTTGCGCATG                                    |
| R                                                                                   |                                                               |
| PLRG1NBXF                                                                           | GATCCATGCACAAACGAAAAC                                         |
| PLRG1NBXR                                                                           | TCGAGTTTTCGTTTGTGCATG                                         |
| PLRG1CBXF                                                                           | GATCCATGCCAGAAATTATCAAGAGAAAGAGAC                             |
| PLRG1BXR                                                                            | TCGAGTCTTTCTCTTGATAATTTCTGGCATG                               |
| PRPF31BXF                                                                           | GATCCATGCGGAAGAAGCGAGGCGGCCGAGGTACCGCAAGATGAAGGAGC            |

PRPF31BXR      GGC  
 TCGAGCCGCTCCTTCATCTTGCGGTACCTGCGGCCGCCTCGCTTCTCCGCATG

Cloning  $\beta$ -galactosidase in pEGFPN1 to generate pBGalGFPN1 using the BamHI restriction site.

BGalBamHIF      AGAAGAGGATCCAGCCACCATGACCATGATTACGGAT  
 BGalBamHIR      AGAAGAGATCCCCTTTTTGACACCAGAC

| Name                                                                       | Sequence                                             |
|----------------------------------------------------------------------------|------------------------------------------------------|
| Quikchange site-directed mutagenesis of pBGalFPN1/AID <sub>[F193A]</sub> . |                                                      |
| K10A                                                                       | CAGCCTCTTGATGAACCGGAGGGCGTTTCTTTACCAATTCAAAAATG      |
| V18SR19V                                                                   | CGGAGGAAGTTTCTTTACCAATTCAAAAATAGCGTCTGGGCTAAGGGTCCGG |
| W20K                                                                       | CAATTCAAAAATGTCCGCAAGGCTAAGGGTCCGGCGTGA              |
| G23S                                                                       | CCGCTGGGCTAAGAGTCGGCGTGAGAC                          |
| R50G                                                                       | CACTGGACTTTGGTTATCTTGGCAATAAGAACGGC                  |
| R112D                                                                      | GAGGATCTTCACCGCGGACCTCTACTTCTGTGAG                   |

Cloning CTNNBL1 and N-terminally truncated mutants in pOPTH using NdeI and BamHI restriction sites.

NAPNdeF      TATATCATATGATGGACGTGGGCGAACTTCTGAG  
 NAP77NdeF      GAGGATCTTCACCGCGGACCTCTACTTCTGTGAG  
 NAPBamR      TAATAGGATCCCTAGAAGTTCTCCAGC

PCR amplification of nuclear transport factor ORFs from a human spleen cDNA library (Invitrogen) and subcloning into pcdna3.1/3xHA (Ref. 1) and pGEX4T1 using the BamHI restriction site.

Kpna1F      GCATAGGGATCCGCCACCATGACCACCCAGGAAAAGA  
 Kpna1R      ACAATGGGATCCTCAAAGCTGGAAACCTT  
 Kpna2F      AGAAGAGGATCCGCCACCATGTCCACCAACGAGAATGCT  
 Kpna2R      AGAAGAGGATCCCTAAAAGTTAAAGGTCCCAG  
 Kpnb1F      CCGAAGGGATCCGCCACCATGGAGCTGATCACCATTCT  
 Kpnb1R      CCGAAGGGATCCTCAAGCTTGGTTCTTCAGTTT  
 RanF      AGAAGAGGATCCGCCACCATGGCTGCGCAGGGAGA  
 RanR      AGAAAGGGATCCTCACAGGTCATCATCCTCAT  
 CRM1F      AGAAGAGGATCCGCCACCATGCCAGCAATTATGACAA  
 CRM1R      GTACCGGGATCCTTAATCACACATTTCTTCTG

Cloning CTNNBL1 and truncated mutants into pEGFPN1 using the HindIII and SacII restriction sites.

NAPHindF      TTTTAAGCTTGCCACCATGGACGTGGGCGAACTT  
 DeltaNLSHindF      TTTTAAGCTTGCCACCATGCAAACGTGGTACTCGAGAACGC  
 NLSHindF      TTTTAAGCTTGCCACCATGAAACGTCCCCGGGATGATG  
 NAPSBR      TTTTGGATCCCCGCGGGAAGTTCTCCAGCAAGCCAG

| Name | Sequence |
|------|----------|
|------|----------|

Cloning karyopherin  $\alpha$ s into pOPTH (kind gift of Dr. O. Perisic, Cambridge) using the NdeI and BamHI restriction sites.

|         |                                   |
|---------|-----------------------------------|
| hKapa1F | CGCATAGACCACCCAGGAAAAGAGAACTTTTCG |
| hKapa1R | CGGGATCCTCAAAGCTGGAAACCTTCCATAGG  |
| hKapa2F | CGCATATGTCCACCAACGAGAATGCTAATAC   |
| hKapa2R | CGGGATCCCTAAAAGTTAAAGGTCCCAGGAG   |

Cloning CTNNBL1 N-terminal domain fragments into pOPTG using the NdeI and BamHI restriction sites.

|                      |                                           |
|----------------------|-------------------------------------------|
| 26-33F               | CGCATATGCAGAAGATGCGTCGGAACAACTTAGGGATCCCG |
| 26-33R               | CGGGATCCCTAAGTTTGTTCGACGCATCTTCTGCATATGCG |
| 13-33/44F            | CGCATATGAGGGGCACAAAACGTCCCCGG             |
| 13-44R               | CGGGATCCCTATTCTTCCCGATAGCGGCCG            |
| 13-33R               | CGGGATCCCTAAGTTTGTTCGACGCATC              |
| 13-33/44R13A         | CGCATATGGCGGGCACAAAACGTCCCCGGGATG         |
| 13-33/44K16A         | CGCATATGAGGGGCACAGCGCGTCCCCGGGATG         |
| 13-33/44K16AR17A     | CGCATATGAGGGGCACAAAAGCGCCCCGGGATG         |
| 13-33/44R13AK16AR17A | CGCATATGGCGGGCACAGCGCGCCCCGGGATG          |
| 1-77F                | CGCATATGGACGTGGGGCAACTTCTGAGTACCAG        |
| 1-77R                | CGGGATCCCTATGGCTCCTCCTTCTCCTTTCCTC        |

Sequencing CTNNBL1.

|           |                           |
|-----------|---------------------------|
| NAPF1     | ATGGACGTGGGGCAACTTCTGAGC  |
| NAPF2     | CTTCTACAGTGGCTGTTGAAGAGG  |
| NAPF3     | GGGCAGCAGCGGACCCGGCTTC    |
| NAPR1     | CTAGAAGTTCTCCAGCAAGCCCAGG |
| NAPR2     | GGCATGGTCCAGCACTTTCAGGGC  |
| NAPR3     | GGCATGGTCCAGCACTTTCAGGGC  |
| pOPTHORFR | GGCAGCAGCCAACTCAGCTTCC    |

Sequencing pOPTG/pOPTH constructs.

|     |                      |
|-----|----------------------|
| T7F | TAATACGACTCACTATAGGG |
| T7R | CTAGTTATTGCTCAGCGG   |

Sequencing pGEX4T1 constructs.

|        |                         |
|--------|-------------------------|
| pGEX5' | GGGCTGGCAAGCCACGTTTGGTG |
| pGEX3' | CCGGGAGCTGCATGTGTCAGAGG |

Cloning AID into pMXs-ires-GFP

|            |                                                                |
|------------|----------------------------------------------------------------|
| AIDF       | GCGGATCCGCCACCATGGACAGCCTC                                     |
| AID-HAR    | GCGAATTCTCAAGCGTAATCTGGAACATCGTATGGGTATCCTCCT<br>CCAAGTCCCAAAG |
| SV40R      | GCGAATTCTCAGACTTTACGCTTCTTTTTAGGAGCGTAATCTGG                   |
| CDC5LNLS3R | GCGAATTCTCATCTTCTTTTTCTTTTCTTAGCGTAATCTGG                      |

Reference

1. Mund T, Pelham HR (2009) Control of the activity of WW-HECT domain E3 ubiquitin ligases by NDFIP proteins. *EMBO Rep* 10: 501-507.

## Table SII

### Buffers

|                          |                                                                                                                                                                                                                                                   |
|--------------------------|---------------------------------------------------------------------------------------------------------------------------------------------------------------------------------------------------------------------------------------------------|
| <b>Lysis Buffer</b>      | 0.1% Triton X-100<br>20 mM Tris.HCl pH 8.0<br>125 mM NaCl<br>3 mM MgCl <sub>2</sub><br>10% glycerol<br>Complete protease inhibitor cocktail (Roche)<br>150 U ml <sup>-1</sup> benzonase (Novagen)<br>400 µg ml <sup>-1</sup> lysolecithin (Sigma) |
| <b>Buffer A</b>          | 20 mM HEPES pH 7.3<br>110 mM potassium acetate<br>1 mM EGTA<br>2 mM magnesium acetate<br>10% glycerol<br>0.2% Tween-20<br>0.2% BSA<br>5 mM 2-mercaptoethanol                                                                                      |
| <b>Buffer B</b>          | 50 mM Tris.HCl pH 7.5<br>200 mM NaCl<br>5mM 2-mercaptoethanol                                                                                                                                                                                     |
| <b>Buffer C</b>          | 20mM Tris.HCl pH 7.4<br>100 mM NaCl<br>0.1% Triton X-100<br>5 mM dithiothreitol                                                                                                                                                                   |
| <b>Buffer D (pH 8.0)</b> | 50 mM sodium phosphate<br>150 mM NaCl<br>20 mM imidazole<br>5 mM 2-mercaptoethanol                                                                                                                                                                |
